# Supplementary material for: Using Comorbidity Pattern Analysis to Detect Reliable Methylated Genes in Colorectal Cancer Verified by Stool DNA Test
Source: MDPI journal article supplement (doi:10.3390/genes12101539), 2021-09-28
Supplement: s1 [file s1]

**Supplementary Table S1.** Demographic characteristics of participants.

| Status          | Gender |        | Age       | Stage |    |     |    | Race  |
|-----------------|--------|--------|-----------|-------|----|-----|----|-------|
|                 | Male   | Female | mean (SD) | I     | II | III | IV |       |
| Normal (n = 13) | 7      | 6      | 41 (10.2) |       |    |     |    | Asian |
| Adenoma (n = 4) | 3      | 1      | 63 (8.1)  |       |    |     |    | Asian |
| CRC (n = 13)    | 11     | 2      | 63 (8.5)  | 2     | 2  | 6   | 3  | Asian |
