# Supplementary material for: Using Comorbidity Pattern Analysis to Detect Reliable Methylated Genes in Colorectal Cancer Verified by Stool DNA Test
Source: MDPI journal article supplement (doi:10.3390/genes12101539), 2021-09-28
Supplement: s1 [file s1]

**Supplementary Table S5.** The comparison of OR combination and linear combination with *ADHFE1*, *SDC2* and *PPP2R5C*.

| <i>ADHFE1+SDC2+PPP2R5C</i>             |                             |                    |
|----------------------------------------|-----------------------------|--------------------|
|                                        | OR combination <sup>1</sup> | linear combination |
| Cut-off value                          | <i>ADHFE1</i> : 5.02        |                    |
|                                        | <i>SDC2</i> : 7.50          | 0.25               |
|                                        | <i>PPP2R5C</i> : 9.33       |                    |
| Sensitivity                            | 84.6%                       | 84.6%              |
| (Positive number/case) <sup>2</sup>    | (11/13)                     | (11/13)            |
| Specificity                            | 92.3%                       | 92.3%              |
| (Positive number/control) <sup>3</sup> | (12/13)                     | (12/13)            |

<sup>1</sup> OR combination means anyone positive of these three genes (*ADHFE1*, *SDC2* and *PPP2R5C*).

<sup>2</sup> The numbers in parentheses represent the CRC cases successfully identified by the hypermethylated genes/total CRC subjects.

<sup>3</sup> The numbers in parentheses represent the control subject number of correctly identified as normal/total control subjects.
