# Supplementary material for: Using Comorbidity Pattern Analysis to Detect Reliable Methylated Genes in Colorectal Cancer Verified by Stool DNA Test
Source: MDPI journal article supplement (doi:10.3390/genes12101539), 2021-09-28
Supplement: s1 [file s1]

Archive with 6 entries (5 files):
- authors add  supplemenary information/
- authors add  supplemenary information/S1_Demographic characteristics of testing subjects.pdf
- authors add  supplemenary information/S2_152 Primary DMPs.xlsx
- authors add  supplemenary information/S3_51 Candidate DMPs.xlsx
- authors add  supplemenary information/S4_Cutoff values of selected biomarkers.xlsx
- authors add  supplemenary information/S5_OR combination vs linear combination of selected biomarkers.pdf
