# Supplementary material for: Using Comorbidity Pattern Analysis to Detect Reliable Methylated Genes in Colorectal Cancer Verified by Stool DNA Test
Source: MDPI journal article supplement (doi:10.3390/genes12101539), 2021-09-28
Supplement: s1 [file s1 › authors add supplemenary information/S3_51 Candidate DMPs.xlsx]

## Sheet: 83_secondery_biomarkers
Probe_ID	delta_beta	gene	feat.cgi
cg08190291	0.532726	ADAMTS5	TSS200-island
cg01588438	0.64501	ADHFE1	TSS200-island
cg14249876	0.514624	AEBP1	1stExon-opensea
cg09248054	0.533228	AGRN	Body-island
cg26122980	0.545562	AMPH	5'UTR-island
cg08162124	0.510196	ATP11A	Body-shore
cg14106046	-0.500932	B3GNTL1	Body-shelf
cg05937969	0.519876	CASR	5'UTR-island
cg04480386	0.53424	CDH12	5'UTR-opensea
cg07198552	0.517186	CDH4	Body-island
cg09314495	-0.499902	CDK14	Body-opensea
cg01295518	0.502713	CHL1	TSS1500-island
cg23749856	0.548622	CHST2	Body-island
cg07095995	0.533616	COL25A1	TSS200-island
cg21938148	0.539516	COL4A1	Body-island
cg17128947	0.54225	CPLX1	3'UTR-island
cg24610236	0.502136	CRHR2	1stExon-island
cg14063008	0.51621	DAB2IP	Body-shore
cg20219457	0.538448	DCLK1	1stExon-island
cg06159352	0.503433	ELMO1	5'UTR-island
cg20286200	0.548813	EYA4	TSS1500-island
cg26593267	0.513733	F7	Body-island
cg20702559	0.521925	FAM110B	5'UTR-island
cg26036626	0.531252	FBLIM1	5'UTR-island
cg11965976	0.531117	FBN2	TSS1500-island
cg17872757	0.651051	FLI1	Body-island
cg07418387	-0.493329	FMN2	Body-shelf
cg03502002	0.506801	GALR1	1stExon-island
cg20265733	0.50228	GATA5	TSS200-island
cg00421139	0.507096	GDF6	1stExon-island
cg19485539	0.573669	GFRA1	5'UTR-island
cg11163620	0.511656	GLRB	5'UTR-island
cg07576142	0.57117	GPC6	1stExon-island
cg00817367	0.579608	GRASP	Body-island
cg03394150	0.548834	GSG1L	Body-island
cg21502551	-0.495992	HS6ST3	Body-opensea
cg05766140	0.538881	IRF4	TSS200-island
cg01901262	0.503173	IRX5	Body-island
cg06952671	0.514282	ITGA4	5'UTR-island
cg11838152	-0.550507	ITGBL1	Body-opensea
cg01029623	0.513384	KDM2B	Body-island
cg12587766	0.51913	LIFR	1stExon-island
cg21842523	0.553129	LMO1	Body-island
cg14573876	-0.49347	MAP2K2	Body-shelf
cg07474842	-0.5464	MAP3K5	Body-opensea
cg27200446	0.528921	MDFI	5'UTR-island
cg04882394	0.513178	MIB2	3'UTR-island
cg22333214	0.503849	MIR137	TSS200-shore
cg24185576	0.515205	MPPED2	5'UTR-island
cg14642259	-0.576146	MYBPC3	Body-shore
cg04883903	0.506825	NOS1	5'UTR-island
cg18203366	0.524943	NR5A2	Body-island
cg03430846	0.499079	NRG1	TSS200-island
cg07974511	0.557581	OTX1	Body-island
cg05238517	0.563168	PDGFD	Body-shore
cg21900495	0.610668	PDX1	Body-shore
cg05920961	0.582775	PPP2R5C	Body-island
cg13267264	0.515844	PRDM14	TSS200-island
cg17459204	0.55592	PREX2	TSS200-shore
cg02030008	0.603242	PTPRN2	Body-island
cg17859110	0.51093	PTPRT	TSS1500-island
cg14094027	-0.503658	PXN	5'UTR-opensea
cg01134282	0.513519	RALYL	TSS1500-shore
cg04261408	0.546246	SDC2	Body-island
cg14626259	0.510884	SIM2	Body-shore
cg07136998	0.51567	SLIT3	5'UTR-island
cg09296001	0.597495	SND1	Body-island
cg14650610	0.534181	SPOCK1	5'UTR-island
cg13823136	0.504885	ST6GALNAC5	TSS200-island
cg13324103	-0.551965	SVIL	5'UTR-opensea
cg10145246	0.502375	TBX15	5'UTR-shore
cg04389897	0.51198	TFAP2A	3'UTR-island
cg24562819	0.504984	THBD	1stExon-island
cg10756127	0.509056	TLL1	Body-shore
cg14861089	0.521951	TLX1	Body-island
cg01808545	0.505054	TMEFF2	TSS200-island
cg20968743	-0.498051	TSPAN18	5'UTR-opensea
cg00240432	0.525388	TWIST1	TSS200-island
cg12584684	0.54792	UNC5C	TSS1500-shore
cg13879483	0.542551	USP44	TSS1500-island
cg03976877	0.516422	VIPR2	1stExon-island
cg14763548	0.515943	VSX1	1stExon-island
cg09052083	0.499406	XKR6	Body-island

## Sheet: 51_candidate_biomarkers
Probe_ID	delta_beta	gene	feat.cgi		Sentitivity	Specificity	Accuracy
cg08190291	0.53468	ADAMTS5	TSS200-island		0.691083	1	0.724432
cg01588438	0.648878	ADHFE1	TSS200-island	Selected DMP	0.926752	1	0.934659
cg14249876	0.514624	AEBP1	1stExon-opensea		0.640127	1	0.678977
cg16318112	0.515862	AGRN	Body-island		0.678344	1	0.713068
cg26122980	0.545562	AMPH	5'UTR-island		0.716561	1	0.747159
cg04480386	0.536499	CDH12	5'UTR-opensea		0.694268	1	0.727273
cg07198552	0.520034	CDH4	Body-island		0.738854	0.973684	0.764205
cg17373442	0.51023	CHST2	Body-island		0.678344	1	0.713068
cg07095995	0.53593	COL25A1	TSS200-island		0.678344	1	0.713068
cg17128947	0.54225	CPLX1	3'UTR-island		0.707006	1	0.738636
cg20219457	0.538448	DCLK1	1stExon-island		0.675159	1	0.710227
cg14270292	0.547727	EYA4	5'UTR-island		0.687898	1	0.721591
cg20702559	0.523025	FAM110B	5'UTR-island		0.640127	1	0.678977
cg11017065	0.620329	FLI1	Body-island		0.859873	1	0.875
cg19485539	0.575854	GFRA1	5'UTR-island		0.761146	1	0.786932
cg11163620	0.511656	GLRB	5'UTR-island		0.646497	1	0.684659
cg16792800	0.512849	GPC6	1stExon-island		0.66242	1	0.698864
cg00817367	0.579608	GRASP	Body-island		0.805732	1	0.826705
cg03394150	0.548834	GSG1L	Body-island		0.783439	1	0.806818
cg06223767	0.527197	IRF4	Body-island		0.681529	1	0.715909
cg01901262	0.506203	IRX5	Body-island		0.671975	1	0.707386
cg06952671	0.514282	ITGA4	5'UTR-island		0.633758	1	0.673295
cg11838152	-0.557064	ITGBL1	Body-opensea	Hypo-DMP	0.767516	1	0.792614
cg01029623	0.515477	KDM2B	Body-island		0.598726	1	0.642045
cg21842523	0.553129	LMO1	Body-island		0.745223	1	0.772727
cg00558689	0.526524	MDFI	Body-island		0.681529	1	0.715909
cg24185576	0.516766	MPPED2	5'UTR-island		0.656051	1	0.693182
cg14642259	-0.576146	MYBPC3	Body-shore	Hypo-DMP	0.786624	1	0.809659
cg16993043	0.504344	NR5A2	Body-shore		0.576433	1	0.622159
cg07974511	0.557581	OTX1	Body-island		0.761146	1	0.786932
cg05238517	0.565682	PDGFD	Body-shore		0.719745	1	0.75
cg09975620	0.50638	PDX1	Body-island		0.605096	1	0.647727
cg05920961	0.584268	PPP2R5C	Body-island	Selected DMP	0.745223	1	0.772727
cg13267264	0.515844	PRDM14	TSS200-island		0.66879	1	0.704545
cg06617456	0.515671	PREX2	1stExon-island		0.687898	0.973684	0.71875
cg02030008	0.606681	PTPRN2	Body-island		0.828025	1	0.846591
cg17859110	0.51093	PTPRT	TSS1500-island		0.681529	1	0.715909
cg01134282	0.515475	RALYL	TSS1500-shore		0.646497	1	0.684659
cg04261408	0.549499	SDC2	Body-island	Selected DMP	0.770701	1	0.795455
cg09073398	0.504609	SLIT3	5'UTR-island		0.605096	1	0.647727
cg12628196	0.522844	SND1	Body-island		0.745223	1	0.772727
cg14650610	0.534181	SPOCK1	5'UTR-island		0.713376	1	0.744318
cg06197966	-0.54724	SVIL	5'UTR-opensea	Hypo-DMP	0.802548	1	0.823864
cg24562819	0.507912	THBD	1stExon-island		0.671975	1	0.707386
cg10756127	0.510012	TLL1	Body-shore		0.630573	1	0.670455
cg14861089	0.521951	TLX1	Body-island		0.687898	1	0.721591
cg00240432	0.526167	TWIST1	TSS200-island		0.66242	1	0.698864
cg13265789	0.535346	UNC5C	TSS1500-island		0.684713	1	0.71875
cg13879483	0.542551	USP44	TSS1500-island		0.742038	1	0.769886
cg03976877	0.516422	VIPR2	1stExon-island		0.678344	1	0.713068
cg14763548	0.515943	VSX1	1stExon-island		0.671975	1	0.707386

## Sheet: 125_primary_biomarkers
Probe_ID	delta_beta	P.Value	adj.P.Val	gene	feat.cgi	three races common	83 secondary	51 candidate	Sentitivity	Specificity	Accuracy
cg08190291	0.53468	9.02e-90	1.98e-87	ADAMTS5	TSS200-island	✔	✔	✔	0.691083	1	0.724432
cg15170605	0.515561	4.64e-53	1.84e-51	ADD2	TSS200-shore	✔			0.675159	1	0.710227
cg01588438	0.648878	6.34e-219	8.69e-215	ADHFE1	TSS200-island	✔	✔	✔	0.926752	1	0.934659
cg14249876	0.514624	2.04e-81	3.06e-79	AEBP1	1stExon-opensea	✔	✔	✔	0.640127	1	0.678977
cg16318112	0.515862	1.77e-138	2.36e-135	AGRN	Body-island	✔	✔	✔	0.678344	1	0.713068
cg26122980	0.545562	1.05e-93	2.78e-91	AMPH	5'UTR-island	✔	✔	✔	0.716561	1	0.747159
cg14215472	0.550407	2.77e-126	2.67e-123	ANKRD13B	Body-island				0.802548	1	0.823864
cg08162124	0.510196	5.66e-150	1.07e-146	ATP11A	Body-shore		✔		0.754777	1	0.78125
cg14106046	-0.506985	1.61e-106	7.35e-104	B3GNTL1	Body-shelf		✔		0.611465	1	0.653409
cg01618102	-0.506373	2.94e-101	1.08e-98	BAI3	Body-opensea				0.563694	1	0.610795
cg13356896	0.50178	3.4e-107	1.6e-104	BOLL	TSS200-island	✔			0.684713	1	0.71875
cg13001868	0.531635	5.19e-103	2.06e-100	C17orf46	Body-island	✔			0.703822	1	0.735795
cg05245861	0.504224	4.41e-66	3.21e-64	C18orf34	TSS1500-island				0.611465	1	0.653409
cg16601494	0.575708	9.34e-210	9.34e-206	C1orf70	5'UTR-shore	✔			0.859873	1	0.875
cg20737185	0.525265	2.5e-54	1.05e-52	C6orf186	TSS200-island	✔			0.713376	1	0.744318
cg14015706	0.623787	1.18e-166	3.22e-163	C9orf50	1stExon-island	✔			0.869427	1	0.883523
cg05981038	-0.534913	1.14e-101	4.26e-99	CARD6	1stExon-opensea	✔			0.707006	1	0.738636
cg05937969	0.521524	1.99e-84	3.43e-82	CASR	5'UTR-island		✔		0.643312	1	0.681818
cg11641611	0.618277	1.82e-94	4.94e-92	CCDC48	TSS200-island	✔			0.840764	1	0.857955
cg04480386	0.536499	2.04e-74	2.23e-72	CDH12	5'UTR-opensea	✔	✔	✔	0.694268	1	0.727273
cg07198552	0.520034	5.15e-145	8.48e-142	CDH4	Body-island	✔	✔	✔	0.738854	0.973684	0.764205
cg09314495	-0.506251	1.15e-95	3.27e-93	CDK14	Body-opensea		✔		0.557325	1	0.605114
cg01295518	0.504234	1.33e-62	8.24e-61	CHL1	TSS1500-island		✔		0.617834	1	0.659091
cg03853987	0.502919	2.12e-45	5.83e-44	CHST10	TSS200-island				0.630573	1	0.670455
cg17373442	0.51023	2.12e-150	4.05e-147	CHST2	Body-island	✔	✔	✔	0.678344	1	0.713068
cg25842285	0.55193	6.55e-122	5.42e-119	CNNM1	1stExon-island	✔			0.716561	1	0.747159
cg07095995	0.53593	2.67e-114	1.71e-111	COL25A1	TSS200-island	✔	✔	✔	0.678344	1	0.713068
cg21938148	0.539516	2.7e-138	3.57e-135	COL4A1	Body-island		✔		0.684713	1	0.71875
cg17128947	0.54225	2.87e-152	5.75e-149	CPLX1	3'UTR-island	✔	✔	✔	0.707006	1	0.738636
cg24610236	0.502136	2.81e-64	1.88e-62	CRHR2	1stExon-island		✔		0.703822	1	0.735795
cg14233354	0.508416	5.15e-94	1.37e-91	CRTAC1	TSS200-island				0.621019	1	0.661932
cg27650175	0.509082	9.49e-50	3.23e-48	DAB2IP	Body-shore		✔		0.694268	1	0.727273
cg20219457	0.538448	6.45e-103	2.56e-100	DCLK1	1stExon-island	✔	✔	✔	0.675159	1	0.710227
cg07700514	0.503768	6.87e-77	8.47e-75	DKFZP434H168	TSS200-shelf				0.605096	1	0.647727
cg12799689	0.519438	7.93e-122	6.52e-119	DOK6	TSS1500-island	✔			0.659236	1	0.696023
cg06825142	0.505209	2.56e-58	1.3e-56	DRD4	TSS200-island	✔			0.649682	1	0.6875
cg06159352	0.504799	2.12e-62	1.3e-60	ELMO1	5'UTR-island		✔		0.643312	1	0.681818
cg14270292	0.547727	5.23e-109	2.68e-106	EYA4	5'UTR-island	✔	✔	✔	0.687898	1	0.721591
cg26593267	0.516688	1.15e-111	6.63e-109	F7	Body-island		✔		0.627389	1	0.667614
cg20702559	0.523025	8.25e-64	5.4e-62	FAM110B	5'UTR-island	✔	✔	✔	0.640127	1	0.678977
cg03514404	0.53029	1.47e-124	1.35e-121	FAM115A	5'UTR-shelf				0.649682	1	0.6875
cg26036626	0.531252	2.93e-127	2.95e-124	FBLIM1	5'UTR-island		✔		0.742038	1	0.769886
cg11965976	0.534037	6.31e-74	6.73e-72	FBN2	TSS1500-island		✔		0.716561	1	0.747159
cg24507144	0.516805	6.28e-53	2.48e-51	FGF14	Body-island	✔			0.652866	1	0.690341
cg04457196	0.504911	6.9e-72	6.66e-70	FIGN	TSS1500-island				0.621019	1	0.661932
cg11017065	0.620329	7.45e-132	8.53e-129	FLI1	Body-island	✔	✔	✔	0.859873	1	0.875
cg07418387	-0.500421	1.24e-91	2.95e-89	FMN2	Body-shelf		✔		0.550955	1	0.599432
cg03502002	0.506801	1.03e-111	5.95e-109	GALR1	1stExon-island		✔		0.659236	1	0.696023
cg20265733	0.50228	1.16e-57	5.73e-56	GATA5	TSS200-island		✔		0.72293	1	0.752841
cg00421139	0.507096	8.42e-144	1.33e-140	GDF6	1stExon-island		✔		0.636943	1	0.676136
cg19485539	0.575854	9.29e-105	3.96e-102	GFRA1	5'UTR-island	✔	✔	✔	0.761146	1	0.786932
cg11163620	0.511656	1.31e-105	5.77e-103	GLRB	5'UTR-island	✔	✔	✔	0.646497	1	0.684659
cg16792800	0.512849	2.52e-169	7.52e-166	GPC6	1stExon-island	✔	✔	✔	0.66242	1	0.698864
cg22821324	0.515547	1.48e-100	5.21e-98	GPM6A	5'UTR-island				0.649682	1	0.6875
cg00817367	0.579608	2.23e-130	2.46e-127	GRASP	Body-island	✔	✔	✔	0.805732	1	0.826705
cg21187769	0.506094	1.75e-53	7.08e-52	GRID2	Body-island				0.630573	1	0.670455
cg03394150	0.548834	7.94e-90	1.74e-87	GSG1L	Body-island	✔	✔	✔	0.783439	1	0.806818
cg25185881	0.51785	6.6e-96	1.91e-93	GUCY1B3	Body-island	✔			0.636943	1	0.676136
cg21502551	-0.502735	3.27e-95	9.15e-93	HS6ST3	Body-opensea		✔		0.538217	1	0.588068
cg07629355	0.520011	6.97e-101	2.51e-98	IGSF9B	Body-island	✔			0.60828	1	0.650568
cg06223767	0.527197	9.21e-143	1.42e-139	IRF4	Body-island	✔	✔	✔	0.681529	1	0.715909
cg01901262	0.506203	3.44e-115	2.3e-112	IRX5	Body-island	✔	✔	✔	0.671975	1	0.707386
cg06952671	0.514282	2.76e-147	4.92e-144	ITGA4	5'UTR-island	✔	✔	✔	0.633758	1	0.673295
cg11838152	-0.557064	9.52e-199	7.19e-195	ITGBL1	Body-opensea	✔	✔	✔	0.767516	1	0.792614
cg20392607	0.511348	4.34e-81	6.45e-79	KCNA1	TSS1500-island				0.621019	1	0.661932
cg01029623	0.515477	4.53e-192	2.58e-188	KDM2B	Body-island	✔	✔	✔	0.598726	1	0.642045
cg18239753	0.504775	2.97e-130	3.26e-127	KHDRBS2	1stExon-island	✔			0.563694	1	0.610795
cg00185566	0.50292	2.04e-151	4e-148	KIAA1026	Body-island	✔			0.640127	1	0.678977
cg08131100	0.517531	2.53e-52	9.7e-51	KRBA1	TSS1500-island	✔			0.681529	1	0.715909
cg12587766	0.51913	5.16e-76	6.11e-74	LIFR	1stExon-island		✔		0.659236	1	0.696023
cg21842523	0.553129	3.16e-71	2.96e-69	LMO1	Body-island	✔	✔	✔	0.745223	1	0.772727
cg03048083	0.527152	5.5e-82	8.46e-80	LOC100133991	Body-island	✔			0.649682	1	0.6875
cg23142394	0.51239	8.46e-85	1.48e-82	LOC283392	Body-island				0.678344	1	0.713068
cg14573876	-0.500381	1.24e-90	2.84e-88	MAP2K2	Body-shelf		✔		0.611465	1	0.653409
cg21778987	-0.502556	1.12e-109	5.9e-107	MAP3K5	Body-opensea		✔		0.691083	1	0.724432
cg00558689	0.526524	2.48e-163	6.37e-160	MDFI	Body-island	✔	✔	✔	0.681529	1	0.715909
cg04882394	0.516017	5.96e-81	8.79e-79	MIB2	3'UTR-island		✔		0.684713	1	0.71875
cg22333214	0.503849	6.89e-116	4.68e-113	MIR137	TSS200-shore		✔		0.592357	1	0.636364
cg24185576	0.516766	2.84e-48	9.01e-47	MPPED2	5'UTR-island	✔	✔	✔	0.656051	1	0.693182
cg14642259	-0.576146	6.58e-187	3.25e-183	MYBPC3	Body-shore	✔	✔	✔	0.786624	1	0.809659
cg04883903	0.506825	3.1e-107	1.46e-104	NOS1	5'UTR-island		✔		0.659236	1	0.696023
cg16993043	0.504344	3.36e-159	8.14e-156	NR5A2	Body-shore	✔	✔	✔	0.576433	1	0.622159
cg03430846	0.501962	3e-90	6.72e-88	NRG1	TSS200-island		✔		0.640127	1	0.678977
cg10989763	0.504776	2.02e-125	1.89e-122	NXPH2	Body-island	✔			0.595541	1	0.639205
cg17301223	0.542123	2.12e-198	1.57e-194	OPLAH	Body-island	✔			0.77707	1	0.801136
cg07974511	0.557581	1.39e-126	1.37e-123	OTX1	Body-island	✔	✔	✔	0.761146	1	0.786932
cg05238517	0.565682	5.45e-97	1.66e-94	PDGFD	Body-shore	✔	✔	✔	0.719745	1	0.75
cg09975620	0.50638	2.36e-164	6.16e-161	PDX1	Body-island	✔	✔	✔	0.605096	1	0.647727
cg05920961	0.584268	3.56e-59	1.88e-57	PPP2R5C	Body-island	✔	✔	✔	0.745223	1	0.772727
cg13267264	0.515844	3.56e-84	6.06e-82	PRDM14	TSS200-island	✔	✔	✔	0.66879	1	0.704545
cg06617456	0.515671	5.53e-155	1.17e-151	PREX2	1stExon-island	✔	✔	✔	0.687898	0.973684	0.71875
cg13895235	0.605216	1.09e-203	8.95e-200	PRKAR1B	5'UTR-shore	✔			0.83121	1	0.849432
cg02030008	0.606681	1.9e-108	9.56e-106	PTPRN2	Body-island	✔	✔	✔	0.828025	1	0.846591
cg17859110	0.51093	2.69e-77	3.39e-75	PTPRT	TSS1500-island	✔	✔	✔	0.681529	1	0.715909
cg14094027	-0.511258	6.32e-120	4.95e-117	PXN	5'UTR-opensea		✔		0.592357	1	0.636364
cg01134282	0.515475	4.4e-60	2.43e-58	RALYL	TSS1500-shore	✔	✔	✔	0.646497	1	0.684659
cg04261408	0.549499	2.59e-103	1.04e-100	SDC2	Body-island	✔	✔	✔	0.770701	1	0.795455
cg26878816	0.525082	2.45e-87	4.84e-85	SFMBT2	5'UTR-island				0.732484	1	0.761364
cg14626259	0.513641	1.81e-114	1.17e-111	SIM2	Body-shore		✔		0.611465	1	0.653409
cg18023283	0.572545	2.07e-106	9.4e-104	SLC6A15	TSS1500-island	✔			0.805732	1	0.826705
cg09073398	0.504609	5.32e-116	3.62e-113	SLIT3	5'UTR-island	✔	✔	✔	0.605096	1	0.647727
cg12628196	0.522844	3.42e-248	1.15e-243	SND1	Body-island	✔	✔	✔	0.745223	1	0.772727
cg24403845	0.514639	1.81e-82	2.86e-80	SORCS1	TSS200-island	✔			0.671975	1	0.707386
cg14650610	0.534181	8e-103	3.16e-100	SPOCK1	5'UTR-island	✔	✔	✔	0.713376	1	0.744318
cg27515369	0.539986	5.18e-59	2.72e-57	SPSB4	TSS200-island	✔			0.719745	1	0.75
cg13823136	0.507827	4.02e-118	2.99e-115	ST6GALNAC5	TSS200-island		✔		0.633758	1	0.673295
cg02500300	0.502792	3.41e-100	1.18e-97	STOX2	1stExon-island	✔			0.576433	1	0.622159
cg06197966	-0.54724	3.86e-215	4.47e-211	SVIL	5'UTR-opensea	✔	✔	✔	0.802548	1	0.823864
cg10145246	0.505003	2.78e-124	2.49e-121	TBX15	5'UTR-shore		✔		0.601911	1	0.644886
cg04389897	0.514754	2.7e-122	2.26e-119	TFAP2A	3'UTR-island		✔		0.66242	1	0.698864
cg24562819	0.507912	9.63e-99	3.16e-96	THBD	1stExon-island	✔	✔	✔	0.671975	1	0.707386
cg10756127	0.510012	2.29e-59	1.22e-57	TLL1	Body-shore	✔	✔	✔	0.630573	1	0.670455
cg14861089	0.521951	5.14e-112	3.03e-109	TLX1	Body-island	✔	✔	✔	0.687898	1	0.721591
cg01808545	0.506196	2e-57	9.73e-56	TMEFF2	TSS200-island		✔		0.633758	1	0.673295
cg18106312	0.501267	6.79e-73	6.88e-71	TRIM9	Body-island				0.627389	1	0.667614
cg20968743	-0.502371	2.33e-146	3.98e-143	TSPAN18	5'UTR-opensea		✔		0.681529	1	0.715909
cg00240432	0.526167	2.6e-59	1.39e-57	TWIST1	TSS200-island	✔	✔	✔	0.66242	1	0.698864
cg13265789	0.535346	5.55e-96	1.62e-93	UNC5C	TSS1500-island	✔	✔	✔	0.684713	1	0.71875
cg13879483	0.542551	3.4e-97	1.04e-94	USP44	TSS1500-island	✔	✔	✔	0.742038	1	0.769886
cg03976877	0.516422	9.81e-96	2.81e-93	VIPR2	1stExon-island	✔	✔	✔	0.678344	1	0.713068
cg14763548	0.515943	1.05e-117	7.67e-115	VSX1	1stExon-island	✔	✔	✔	0.671975	1	0.707386
cg21769093	-0.503562	2.58e-107	1.22e-104	VWC2	Body-shelf	✔			0.582803	1	0.627841
cg17362861	0.506625	3.73e-105	1.61e-102	WDR86	TSS200-island	✔			0.621019	1	0.661932
cg09052083	0.50089	2.77e-43	6.92e-42	XKR6	Body-island		✔		0.656051	1	0.693182
cg17892556	0.616094	1.31e-108	6.66e-106	ZNF625	1stExon-island	✔			0.850318	1	0.866477
