# Supplementary material for: Using Comorbidity Pattern Analysis to Detect Reliable Methylated Genes in Colorectal Cancer Verified by Stool DNA Test
Source: MDPI journal article supplement (doi:10.3390/genes12101539), 2021-09-28
Supplement: s1 [file s1 › authors add supplemenary information/S4_Cutoff values of selected biomarkers.xlsx]

## Sheet: ADHFE1 dCp Sen&Spe
CutPoints	Sensitivity%	95% CI	Specificity%	95% CI	Likelihood ratio	Youden's J
< -2.125	7.692	0.3946% to 33.31%	100	77.19% to 100.0%		7.692
< 0.9050	15.38	2.734% to 42.23%	100	77.19% to 100.0%		15.38
< 1.585	23.08	8.180% to 50.26%	100	77.19% to 100.0%		23.08
< 1.750	30.77	12.68% to 57.63%	100	77.19% to 100.0%		30.77
< 1.970	38.46	17.71% to 64.48%	100	77.19% to 100.0%		38.46
< 2.220	46.15	23.21% to 70.86%	100	77.19% to 100.0%		46.15
< 2.570	53.85	29.14% to 76.79%	100	77.19% to 100.0%		53.85
< 3.160	61.54	35.52% to 82.29%	100	77.19% to 100.0%		61.54
< 3.860	69.23	42.37% to 87.32%	100	77.19% to 100.0%		69.23
< 4.360	76.92	49.74% to 91.82%	100	77.19% to 100.0%		76.92
< 5.020	84.62	57.77% to 97.27%	100	77.19% to 100.0%		84.62
< 6.010	84.62	57.77% to 97.27%	92.31	66.69% to 99.61%	11	76.93
< 8.020	84.62	57.77% to 97.27%	84.62	57.77% to 97.27%	5.5	69.24
< 9.825	84.62	57.77% to 97.27%	76.92	49.74% to 91.82%	3.667	61.54
< 10.48	84.62	57.77% to 97.27%	69.23	42.37% to 87.32%	2.75	53.85
< 10.96	84.62	57.77% to 97.27%	61.54	35.52% to 82.29%	2.2	46.16
< 11.45	92.31	66.69% to 99.61%	61.54	35.52% to 82.29%	2.4	53.85
< 12.98	92.31	66.69% to 99.61%	53.85	29.14% to 76.79%	2	46.16
< 14.27	92.31	66.69% to 99.61%	46.15	23.21% to 70.86%	1.714	38.46
< 14.82	92.31	66.69% to 99.61%	38.46	17.71% to 64.48%	1.5	30.77
< 15.22	92.31	66.69% to 99.61%	30.77	12.68% to 57.63%	1.333	23.08
< 15.40	92.31	66.69% to 99.61%	23.08	8.180% to 50.26%	1.2	15.39
< 16.26	92.31	66.69% to 99.61%	15.38	2.734% to 42.23%	1.091	7.69
< 17.00	92.31	66.69% to 99.61%	7.692	0.3946% to 33.31%	1	0.002
< 18.18	92.31	66.69% to 99.61%	0	0.000% to 22.81%	0.9231	-7.69

## Sheet: SDC2 dCp Sen&Spe
CutPoints	Sensitivity%	95% CI	Specificity%	95% CI	Likelihood ratio	Youden's J
< -0.1200	7.692	0.3946% to 33.31%	100	77.19% to 100.0%		7.692
< 0.1100	15.38	2.734% to 42.23%	100	77.19% to 100.0%		15.38
< 0.4000	23.08	8.180% to 50.26%	100	77.19% to 100.0%		23.08
< 0.9500	30.77	12.68% to 57.63%	100	77.19% to 100.0%		30.77
< 1.540	30.77	12.68% to 57.63%	92.31	66.69% to 99.61%	4	23.08
< 2.085	38.46	17.71% to 64.48%	92.31	66.69% to 99.61%	5	30.77
< 2.675	46.15	23.21% to 70.86%	92.31	66.69% to 99.61%	6	38.46
< 3.375	53.85	29.14% to 76.79%	92.31	66.69% to 99.61%	7	46.16
< 4.630	61.54	35.52% to 82.29%	92.31	66.69% to 99.61%	8	53.85
< 7.500	69.23	42.37% to 87.32%	92.31	66.69% to 99.61%	9	61.54
< 10.43	69.23	42.37% to 87.32%	84.62	57.77% to 97.27%	4.5	53.85
< 11.57	76.92	49.74% to 91.82%	84.62	57.77% to 97.27%	5	61.54
< 12.95	76.92	49.74% to 91.82%	76.92	49.74% to 91.82%	3.333	53.84
< 14.03	84.62	57.77% to 97.27%	76.92	49.74% to 91.82%	3.667	61.54
< 14.27	84.62	57.77% to 97.27%	69.23	42.37% to 87.32%	2.75	53.85
< 14.53	84.62	57.77% to 97.27%	61.54	35.52% to 82.29%	2.2	46.16
< 14.87	84.62	57.77% to 97.27%	53.85	29.14% to 76.79%	1.833	38.47
< 15.17	92.31	66.69% to 99.61%	53.85	29.14% to 76.79%	2	46.16
< 15.22	92.31	66.69% to 99.61%	46.15	23.21% to 70.86%	1.714	38.46
< 15.33	92.31	66.69% to 99.61%	38.46	17.71% to 64.48%	1.5	30.77
< 15.47	92.31	66.69% to 99.61%	30.77	12.68% to 57.63%	1.333	23.08
< 15.81	92.31	66.69% to 99.61%	23.08	8.180% to 50.26%	1.2	15.39
< 16.20	92.31	66.69% to 99.61%	15.38	2.734% to 42.23%	1.091	7.69
< 16.65	100	77.19% to 100.0%	15.38	2.734% to 42.23%	1.182	15.38
< 17.00	100	77.19% to 100.0%	7.692	0.3946% to 33.31%	1.083	7.692

## Sheet: PPP2R5C dCp Sen&Spe
CutPoints	Sensitivity%	95% CI	Specificity%	95% CI	Likelihood ratio	Youden's J
< 1.085	7.692	0.3946% to 33.31%	100	77.19% to 100.0%		7.692
< 1.730	15.38	2.734% to 42.23%	100	77.19% to 100.0%		15.38
< 2.115	23.08	8.180% to 50.26%	100	77.19% to 100.0%		23.08
< 2.290	30.77	12.68% to 57.63%	100	77.19% to 100.0%		30.77
< 4.620	38.46	17.71% to 64.48%	100	77.19% to 100.0%		38.46
< 6.920	46.15	23.21% to 70.86%	100	77.19% to 100.0%		46.15
< 7.145	53.85	29.14% to 76.79%	100	77.19% to 100.0%		53.85
< 8.140	61.54	35.52% to 82.29%	100	77.19% to 100.0%		61.54
< 9.330	69.23	42.37% to 87.32%	100	77.19% to 100.0%		69.23
< 9.875	69.23	42.37% to 87.32%	92.31	66.69% to 99.61%	9	61.54
< 10.93	76.92	49.74% to 91.82%	92.31	66.69% to 99.61%	10	69.23
< 11.81	76.92	49.74% to 91.82%	84.62	57.77% to 97.27%	5	61.54
< 12.83	76.92	49.74% to 91.82%	76.92	49.74% to 91.82%	3.333	53.84
< 13.88	84.62	57.77% to 97.27%	76.92	49.74% to 91.82%	3.667	61.54
< 14.03	92.31	66.69% to 99.61%	76.92	49.74% to 91.82%	4	69.23
< 14.12	92.31	66.69% to 99.61%	69.23	42.37% to 87.32%	3	61.54
< 14.33	92.31	66.69% to 99.61%	61.54	35.52% to 82.29%	2.4	53.85
< 14.53	92.31	66.69% to 99.61%	53.85	29.14% to 76.79%	2	46.16
< 14.88	92.31	66.69% to 99.61%	46.15	23.21% to 70.86%	1.714	38.46
< 15.22	92.31	66.69% to 99.61%	38.46	17.71% to 64.48%	1.5	30.77
< 15.33	92.31	66.69% to 99.61%	30.77	12.68% to 57.63%	1.333	23.08
< 15.47	92.31	66.69% to 99.61%	23.08	8.180% to 50.26%	1.2	15.39
< 15.81	92.31	66.69% to 99.61%	15.38	2.734% to 42.23%	1.091	7.69
< 16.53	92.31	66.69% to 99.61%	7.692	0.3946% to 33.31%	1	0.002
< 18.16	92.31	66.69% to 99.61%	0	0.000% to 22.81%	0.9231	-7.69
